# Supplementary material
Source: PubMed Central journal article supplement (PMC4859347)
Supplement: NIHMS726818-supplement-Supplemental.pdf [file NIHMS726818-supplement-Supplemental.pdf]

**Table S1. Voxel-wise comparisons of GMV with age, gender and whole brain volume as nuisance variables**

| Regions            | Cluster P value<br>(FWE corrected) | Voxels | T    | MNI Coordinates<br>(x, y, z) |
|--------------------|------------------------------------|--------|------|------------------------------|
| <b>DS &lt; HC1</b> |                                    |        |      |                              |
| Cerebellar Culmen  | 0.001                              | 1316   | 5.68 | 6 -57 -22                    |
| <b>DS &lt; NDS</b> |                                    |        |      |                              |
| Insula             | 0.009                              | 786    | 4.64 | -32 18 15                    |

**Table S2. Correlational analysis after controlling for age, gender and head size**

|        | PANSS_T     | PANSS_P    | PANSS_N      | PANSS_G     | IQ          |
|--------|-------------|------------|--------------|-------------|-------------|
| Culmen | -.067(.613) | .111(.399) | -.104(.431)  | -.107(.414) | .256(.048)* |
| Insula | -.073(.577) | .215(.099) | -.332(.010)* | -.002(.990) | .022(.869)  |

Showed as r(P); \* P<0.05.

**Table S3. Correlational analysis results in NDS group**

|            | PANSS_T     | PANSS_P     | PANSS_N     | PANSS_G     | IQ         | DUP        |
|------------|-------------|-------------|-------------|-------------|------------|------------|
| Cerebellar | -.194(.208) | -.173(.262) | -.003(.983) | -.252(.099) | .193(.240) | .017(.913) |
| Culmen     |             |             |             |             |            |            |
| Insula     | -.123(.428) | -.228(.137) | -.120(.439) | .041(.795)  | .308(.056) | .153(.322) |

Showed as r(P); \*, P < .05.

**Table S4. Correlational analysis results in DS group**

|            | PANSS_T    | PANSS_P    | PANSS_N    | PANSS_G    | IQ          | DUP        |
|------------|------------|------------|------------|------------|-------------|------------|
| Cerebellar | .100(.519) | .066(.669) | .009(.954) | .120(.439) | .313(.099)  | .136(.379) |
| Culmen     |            |            |            |            |             |            |
| Insula     | .015(.923) | .075(.628) | -.044(.77) | .021(.891) | -.097(.610) | .204(.183) |

Showed as r(P); \*, P < .05.

**Table S5. Brian regions showing significant effects of symptoms or DUP.**

| Regions              | Voxels | Peak T value | MNI Coordinates<br>(x, y, z) |
|----------------------|--------|--------------|------------------------------|
| <b>DUP_negative*</b> |        |              |                              |
| Precentral Gyrus     | 68     | 3.94         | -51 12 10                    |

---

**PANSS-T\_negative\***

|                           |     |      |     |     |     |
|---------------------------|-----|------|-----|-----|-----|
| Superior Temporal Gyrus   | 619 | 4.41 | -55 | -6  | -5  |
| Medial Frontal Gyrus      | 83  | 4.08 | 18  | 26  | 45  |
| Cerebellum Posterior Lobe | 57  | 3.93 | 10  | -60 | -46 |
| Middle Frontal Gyrus      | 64  | 3.68 | 28  | 29  | 48  |
| Precentral Gyrus          | 55  | 3.61 | -42 | 16  | 8   |

---

Aberrations: DUP, duration of untreated psychosis; PANSS-T, PANSS total scores.

\*DUP\_negative, brain regions showing negative correlations between DUP and GMV;

PANSS-T\_negative, brain regions showing negative correlations between PANSS-T and GMV;

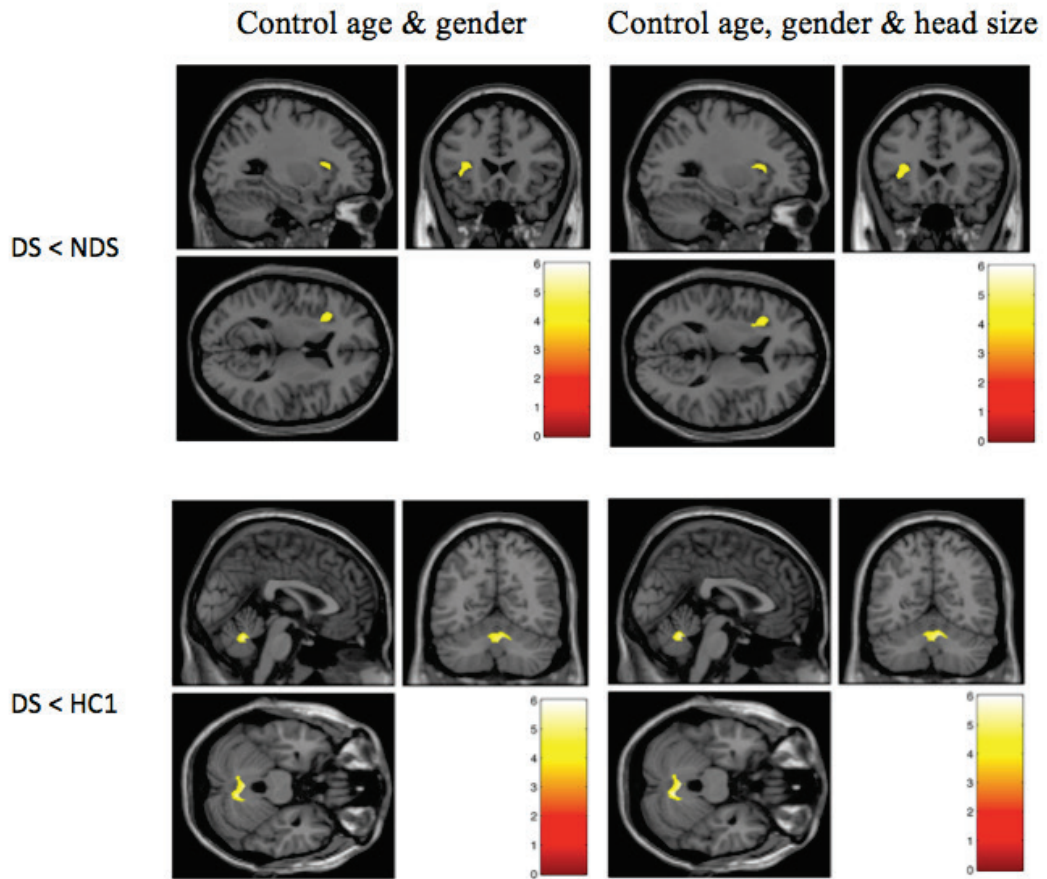

**Figure S1.** Effect of whole brain volume on the GMV differences between groups. Left panel shows the results of DS < NDS and DS < HC1 after controlling for the effect of age and gender; the right panel shows the results of the same contrasts after controlling for the effect of age, gender and WBV.
